# Supplementary material for: Weak Fermi level pinning and low barrier interfacial contact: 2D lead-free perovskites on multilayer GaN
Source: Royal Society of Chemistry journal article supplement (doi:10.1039/d4tc03838j), 2024-10-21
Supplement: d4tc03838j1.pdf [file d4tc03838j1.pdf]

# Weak Fermi Level Pinning and Low Barrier Interfacial Contact: 2D Lead-free Perovskite on Multilayer GaN

Pengjie Fu, Baolin Wang, Mengni Liu, Guixian Ge, Juan Hou,<sup>\*</sup> and Xiaodong Yang<sup>\*</sup>

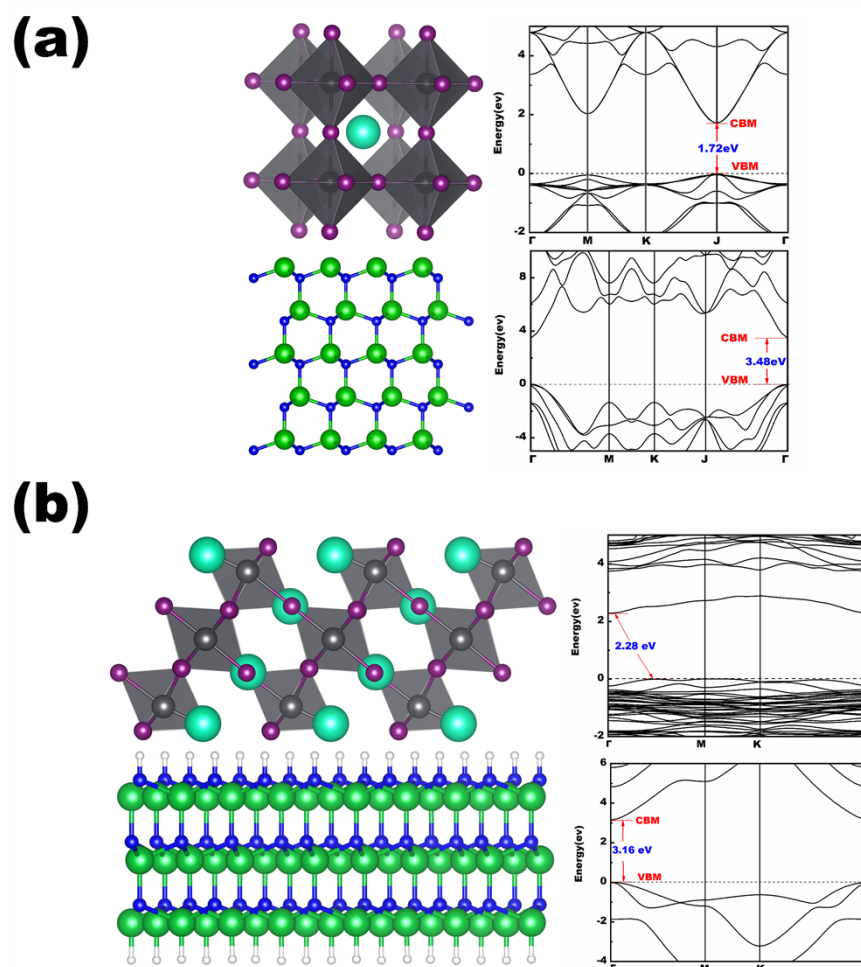

**Fig. S1.** Structures and band gaps of (a) bulk CsPbI<sub>3</sub> and GaN, (b) 2D CsPbI<sub>3</sub> and GaN. The zero of the Fermi energy is set at VBM.

**Table S1.** The band gaps of CsPbI<sub>3</sub> and GaN calculated using different methods. For the comparison, previous reports on the band gaps of CsPbI<sub>3</sub> and GaN were also listed.

| $E_g$ (eV)         | PBE   | SOC   | HSE+SOC | Meta-GGA | Previous works                       |
|--------------------|-------|-------|---------|----------|--------------------------------------|
| CsPbI <sub>3</sub> | 1.408 | 1.503 | 1.652   | 1.716    | 1.67 <sup>1</sup> ,1.73 <sup>2</sup> |
| GaN                | 1.634 | 1.691 | 3.378   | 3.477    | 3.39 <sup>3</sup> ,3.47 <sup>4</sup> |

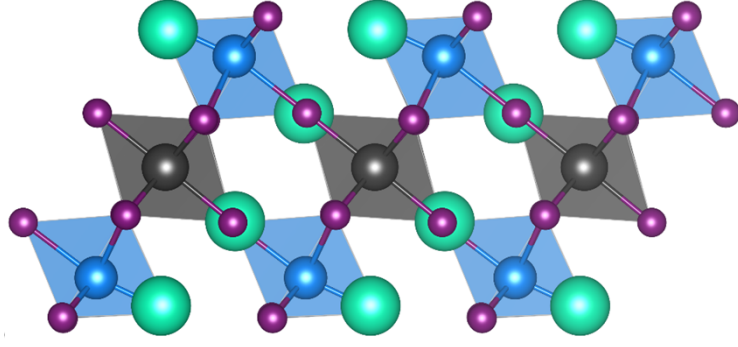

**Fig. S2.** Structure of M-CsPbI<sub>3</sub> (M=Sb, Bi, In) passivated with different metallic elements, respectively.

**Table S2.** Surface energies ( $\gamma_s$ ) of M-CsPbI<sub>3</sub> (M= Pb, Sb, Ln and Bi) nanosheets.

|                                     | CsPbI <sub>3</sub> | Sb-CsPbI <sub>3</sub> | Ln-CsPbI <sub>3</sub> | Bi-CsPbI <sub>3</sub> |
|-------------------------------------|--------------------|-----------------------|-----------------------|-----------------------|
| $\gamma_s(\text{meV}/\text{\AA}^2)$ | 43.52              | -19.55                | 35.74                 | 38.16                 |

$$\gamma_s = \frac{E_T - n_v E_{\text{CsPbI}_3} + \sum \Delta n_M \mu_M}{2A} \quad (\text{S1})$$

where  $E_T$  and  $E_{\text{CsPbI}_3}$  are total energies of 2D M-CsPbI<sub>3</sub> nanosheets and CsPbI<sub>3</sub> in cubic bulk, respectively.  $A$  is the surface area of nanosheets,  $n_v$  is the number of CsPbI<sub>3</sub> formula unit in 2D nanosheets,  $\mu_M$  is the chemical potential of atomic species M (M = Pb, Sb, In and Bi), and  $\Delta n_M$  is the difference of atom numbers between the given 2D structure and  $n_v$  bulk CsPbI<sub>3</sub>.

**Table S3.** Surface energies ( $\gamma_s$ ) of [M<sub>1</sub>]-CsSrI<sub>3</sub> (M<sub>1</sub>= Ba, Sn, Sr, Mg, Ca, Zn, Cu) nanosheets.

|                                     | Ba     | Sn     | Sr     | Mg    | Ca    | Zn    | Cu    |
|-------------------------------------|--------|--------|--------|-------|-------|-------|-------|
| $\gamma_s(\text{meV}/\text{\AA}^2)$ | -32.44 | -19.55 | -12.57 | 35.12 | 28.77 | 38.15 | 40.26 |

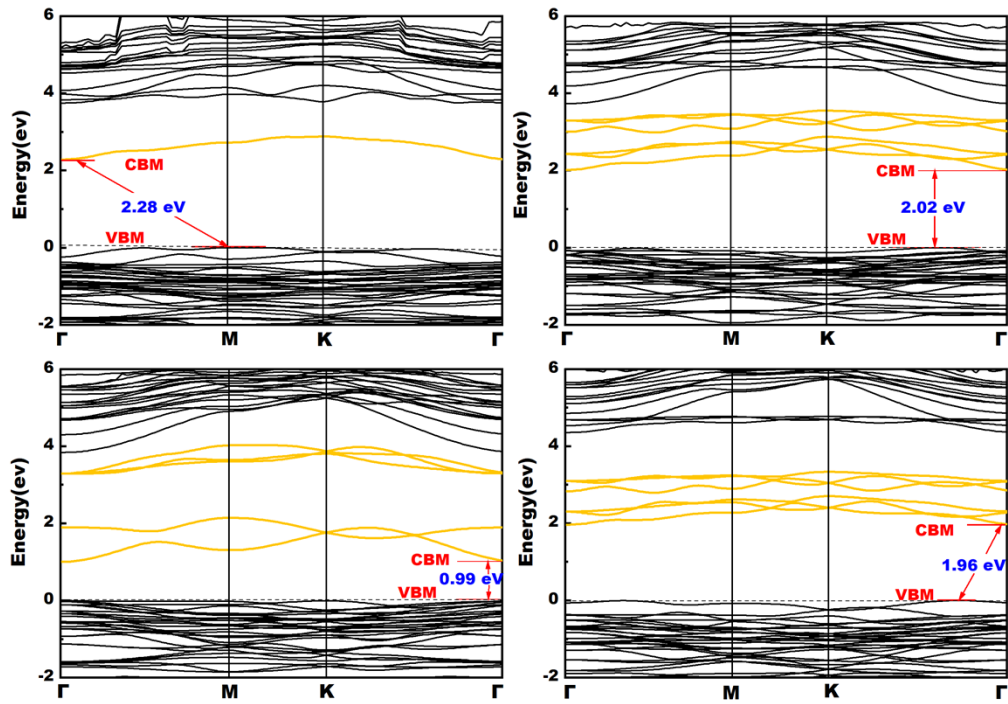

**Fig. S3.** Band gaps of  $[M_1]\text{-CsSrI}_3$  ( $M_1=\text{Sn, Mg, Ca, Zn}$ ) passivated with different metallic elements (a) Sn, (b) Mg, (c) Ca and (d) Zn, respectively. The zero of the Fermi energy is set at VBM. The orange lines represent impurity energy levels.

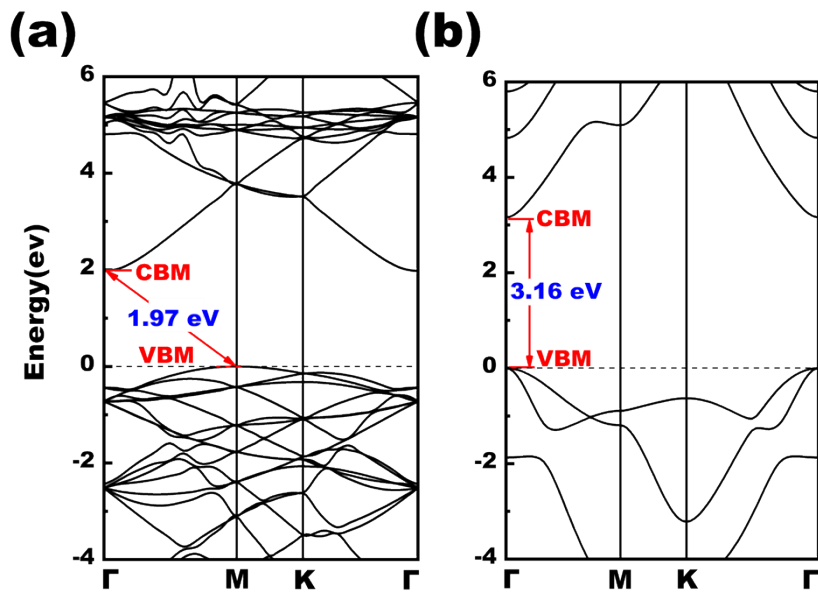

**Fig. S4.** Band structures of (a) non-passivated and (b) passivated GaN.

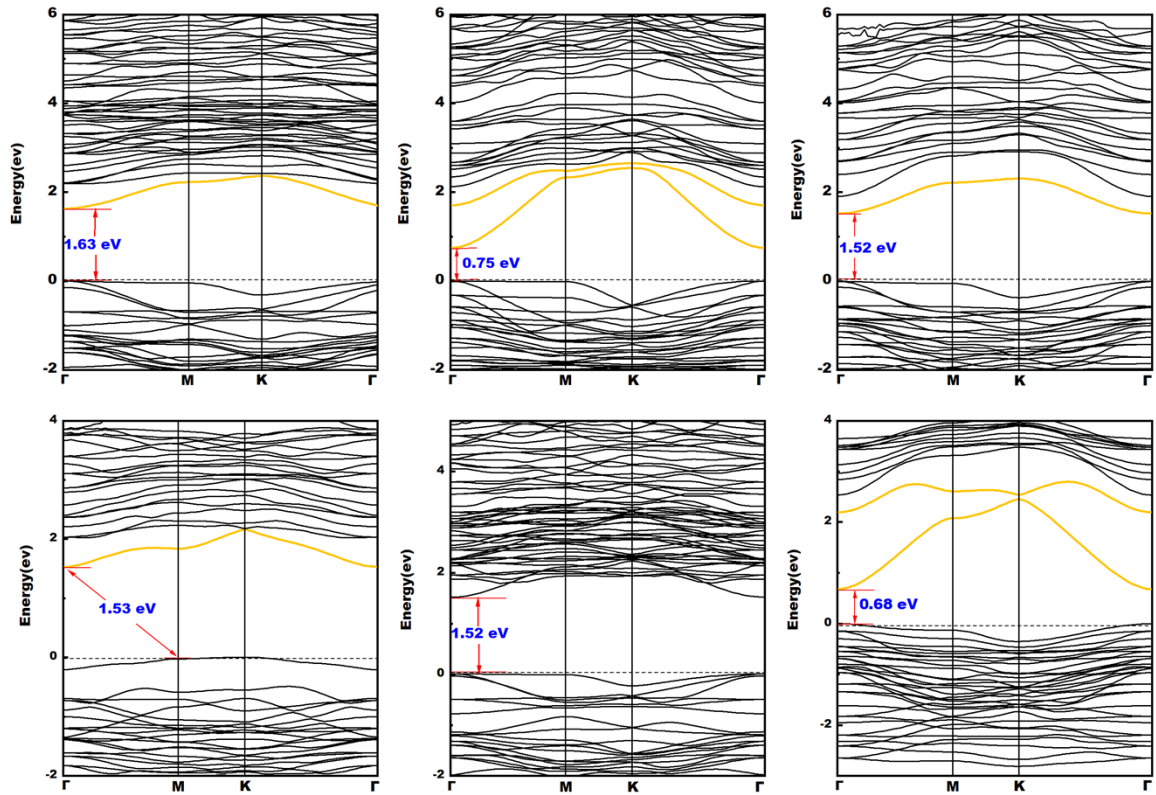

**Fig. S5.** Band structures of 2D perovskite/GaN heterostructures are obtained by the replacement of  $\text{Sr}^{2+}$  in  $\text{BaCsSrI}_3/\text{GaN}$  with (a)  $\text{Sn}^{2+}$ , (b)  $\text{Cu}^{2+}$ , (c)  $\text{Mg}^{2+}$ , (d)  $\text{Ca}^{2+}$ , (e)  $\text{Ba}^{2+}$  and (f)  $\text{Zn}^{2+}$ , respectively. The orange lines represent impurity energy levels.

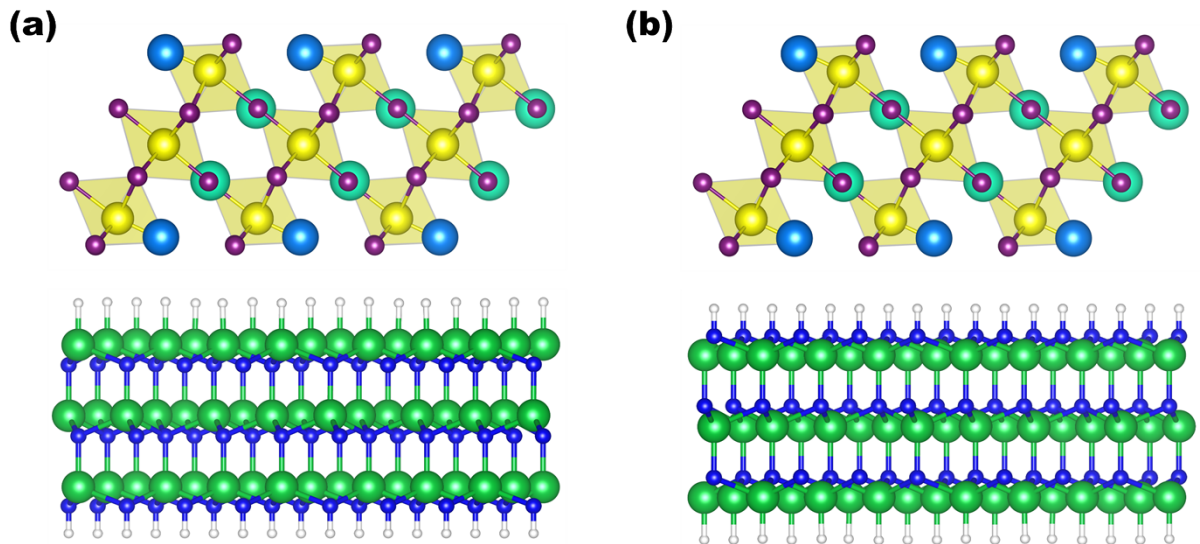

**Fig. S6.** The structure diagrams of the two  $\text{Ba-CsSrI}_3/\text{GaN}$  heterojunction with (a) Ga-top and (b) N-top configurations.

**Table S4.** Elastic stiffness constants  $C_{ij}$  and stability of Ba-CsSrI<sub>3</sub>/GaN heterostructures with different interfacial configurations.

|               | $C_{11}$ | $C_{12}$ | $C_{13}$ | $C_{14}$ | $C_{15}$ | $C_{16}$ | $C_{21}$ | $C_{22}$ | $C_{23}$ | $C_{24}$ | $C_{25}$ | $C_{26}$ |                 |  |
|---------------|----------|----------|----------|----------|----------|----------|----------|----------|----------|----------|----------|----------|-----------------|--|
| <b>Ga-top</b> | 581.05   | 215.26   | 44.62    | -14.54   | -19.25   | 17.43    | 215.26   | 621.88   | 57.96    | -8.71    | -10.21   | 2.81     | <b>stable</b>   |  |
|               | $C_{31}$ | $C_{32}$ | $C_{33}$ | $C_{34}$ | $C_{35}$ | $C_{36}$ | $C_{41}$ | $C_{42}$ | $C_{43}$ | $C_{44}$ | $C_{45}$ | $C_{46}$ |                 |  |
|               | 44.62    | 57.96    | 145.16   | -0.89    | -5.41    | 4.54     | -14.54   | -8.71    | -0.89    | 193.27   | -15.06   | 9.65     |                 |  |
|               | $C_{51}$ | $C_{52}$ | $C_{53}$ | $C_{54}$ | $C_{55}$ | $C_{56}$ | $C_{61}$ | $C_{62}$ | $C_{63}$ | $C_{64}$ | $C_{65}$ | $C_{66}$ |                 |  |
|               | -19.25   | -10.21   | -5.41    | -15.06   | 34.32    | 4.84     | 17.43    | 2.81     | 4.54     | 9.65     | 4.84     | 42.66    |                 |  |
|               | $C_{11}$ | $C_{12}$ | $C_{13}$ | $C_{14}$ | $C_{15}$ | $C_{16}$ | $C_{21}$ | $C_{22}$ | $C_{23}$ | $C_{24}$ | $C_{25}$ | $C_{26}$ |                 |  |
| 122.17        | 127.96   | 34.95    | 38.64    | 16.57    | 14.22    | 127.96   | 14.78    | 13.58    | -2.48    | 2.21     | -2.61    |          |                 |  |
| <b>N-top</b>  | $C_{31}$ | $C_{32}$ | $C_{33}$ | $C_{34}$ | $C_{35}$ | $C_{36}$ | $C_{41}$ | $C_{42}$ | $C_{43}$ | $C_{44}$ | $C_{45}$ | $C_{46}$ | <b>unstable</b> |  |
|               | 34.95    | 13.58    | 21.48    | 14.27    | 6.56     | 26.11    | 38.64    | -2.48    | 14.27    | 15.34    | 4.59     | 3.42     |                 |  |
|               | $C_{51}$ | $C_{52}$ | $C_{53}$ | $C_{54}$ | $C_{55}$ | $C_{56}$ | $C_{61}$ | $C_{62}$ | $C_{63}$ | $C_{64}$ | $C_{65}$ | $C_{66}$ |                 |  |
|               | 16.57    | 2.21     | 6.56     | 4.59     | 9.81     | 43.53    | 14.22    | -2.61    | 26.11    | 3.42     | 43.53    | 7.33     |                 |  |

Taking Ba-CsSrI<sub>3</sub>/GaN heterostructures as an example, both configurations have the triclinic symmetry, resulting in thirty-six independent elastic constants as follows<sup>5</sup>

$$C = \begin{pmatrix} C_{11} & C_{12} & C_{13} & C_{14} & C_{15} & C_{16} \\ C_{21} & C_{22} & C_{23} & C_{24} & C_{25} & C_{26} \\ C_{31} & C_{32} & C_{33} & C_{34} & C_{35} & C_{36} \\ C_{41} & C_{42} & C_{43} & C_{44} & C_{45} & C_{46} \\ C_{51} & C_{52} & C_{53} & C_{54} & C_{55} & C_{56} \\ C_{61} & C_{62} & C_{63} & C_{64} & C_{65} & C_{66} \end{pmatrix} \quad (S2)$$

First-order:  $C_{11} > 0$

Second-order:  $C_{11}C_{22} - C_{12}^2 > 0$

Third-order:  $C_{11}C_{22}C_{33} + 2C_{12}C_{13}C_{23} - C_{11}C_{23}^2 - C_{22}C_{13}^2 - C_{33}C_{12}^2 > 0$

Fourth-order:  $C_{11}(C_{22}C_{33}C_{44} + 2C_{23}C_{24}C_{34} - C_{33}C_{24}^2 - C_{22}C_{34}^2 - C_{44}C_{23}^2) - C_{12}(C_{12}C_{33}C_{44} + C_{23}C_{14}C_{34} + C_{13}C_{24}C_{34} - C_{33}C_{14}C_{24} - C_{12}C_{34}^2 - C_{13}C_{23}C_{44}) + C_{13}(C_{12}C_{23}C_{44} + C_{22}C_{14}C_{34} + C_{13}C_{24}^2 - C_{23}^2C_{14}C_{24} - C_{12}C_{24}C_{34} - C_{22}C_{13}C_{44}) - C_{14}(C_{12}C_{23}C_{34} + C_{22}C_{33}C_{14} + C_{13}C_{23}C_{24} - C_{14}C_{23}^2 - C_{12}C_{33}C_{24} - C_{22}C_{13}C_{34}) > 0$

Fifth-order:  $C_{11}(a-b+c-d) - C_{12}(e-f+g-h) + C_{13}(i-j+k-l) - C_{14}(m-n+o-p) + C_{15}(q-r+s-t) > 0$

$$\sum_{i=1}^{20} A_i B_i > 0$$

Sixth-order:  $i = 1$

Among:

$$a = C_{22}(C_{33}C_{44}C_{55} + 2C_{34}C_{35}C_{45} - C_{44}C_{35}^2 - C_{33}C_{45}^2 - C_{55}C_{34}^2)$$

$$b = C_{23}(C_{23}C_{44}C_{55} + C_{34}C_{25}C_{45} + C_{24}C_{35}C_{45} - C_{44}C_{25}C_{35} - C_{23}C_{45}^2 - C_{24}C_{34}C_{55})$$

$$\begin{aligned}
c &= C_{24}(C_{23}C_{34}C_{55}+C_{33}C_{45}C_{25}+C_{24}C_{35}^2-C_{34}C_{25}C_{35}-C_{23}C_{35}C_{45}-C_{33}C_{24}C_{55}) \\
d &= C_{25}(C_{23}C_{34}C_{45}+C_{33}C_{44}C_{25}+C_{24}C_{34}C_{35}-C_{34}^2C_{25}-C_{23}C_{44}C_{35}-C_{33}C_{24}C_{45}) \\
e &= C_{12}(C_{33}C_{44}C_{55}+2C_{34}C_{35}C_{45}-C_{44}C_{35}^2-C_{33}C_{45}^2-C_{55}C_{34}^2) \\
f &= C_{23}(C_{13}C_{44}C_{55}+C_{34}C_{15}C_{45}+C_{14}C_{35}C_{45}-C_{44}C_{15}C_{35}-C_{13}C_{45}^2-C_{14}C_{34}C_{55}) \\
g &= C_{24}(C_{13}C_{34}C_{55}+C_{33}C_{45}C_{15}+C_{14}C_{35}^2-C_{34}C_{15}C_{35}-C_{13}C_{35}C_{45}-C_{33}C_{14}C_{55}) \\
h &= C_{25}(C_{13}C_{34}C_{45}+C_{33}C_{44}C_{15}+C_{14}C_{34}C_{35}-C_{34}^2C_{15}-C_{13}C_{44}C_{35}-C_{33}C_{14}C_{45}) \\
i &= C_{12}(C_{23}C_{44}C_{55}+C_{34}C_{25}C_{45}+C_{24}C_{35}C_{45}-C_{44}C_{25}C_{35}-C_{23}C_{45}^2-C_{24}C_{34}C_{55}) \\
j &= C_{22}(C_{13}C_{44}C_{55}+C_{34}C_{15}C_{45}+C_{14}C_{35}C_{45}-C_{44}C_{15}C_{35}-C_{13}C_{45}^2-C_{14}C_{34}C_{55}) \\
k &= C_{24}(C_{13}C_{24}C_{55}+C_{23}C_{15}C_{45}+C_{14}C_{25}C_{35}-C_{24}C_{15}C_{35}-C_{13}C_{25}C_{45}-C_{23}C_{14}C_{55}) \\
l &= C_{25}(C_{13}C_{24}C_{45}+C_{23}C_{44}C_{15}+C_{14}C_{34}C_{25}-C_{24}C_{34}C_{15}-C_{13}C_{44}C_{25}-C_{23}C_{14}C_{45}) \\
m &= C_{12}(C_{23}C_{34}C_{55}+C_{33}C_{25}C_{45}+C_{24}C_{35}^2-C_{34}C_{25}C_{35}-C_{23}C_{35}C_{45}-C_{33}C_{24}C_{55}) \\
n &= C_{22}(C_{13}C_{34}C_{55}+C_{33}C_{15}C_{45}+C_{14}C_{35}^2-C_{34}C_{15}C_{35}-C_{13}C_{35}C_{45}-C_{33}C_{14}C_{55}) \\
o &= C_{23}(C_{13}C_{24}C_{55}+C_{23}C_{45}C_{15}+C_{14}C_{25}C_{35}-C_{24}C_{15}C_{35}-C_{13}C_{25}C_{45}-C_{23}C_{14}C_{55}) \\
p &= C_{25}(C_{13}C_{24}C_{35}+C_{23}C_{34}C_{15}+C_{33}C_{14}C_{25}-C_{33}C_{24}C_{15}-C_{13}C_{34}C_{25}-C_{23}C_{14}C_{35}) \\
q &= C_{12}(C_{23}C_{34}C_{45}+C_{33}C_{44}C_{25}+C_{24}C_{34}C_{35}-C_{25}C_{34}^2-C_{23}C_{44}C_{35}-C_{24}C_{33}C_{45}) \\
r &= C_{22}(C_{13}C_{34}C_{45}+C_{33}C_{44}C_{15}+C_{14}C_{34}C_{35}-C_{15}C_{34}^2-C_{13}C_{44}C_{35}-C_{33}C_{14}C_{45}) \\
s &= C_{23}(C_{13}C_{24}C_{45}+C_{23}C_{44}C_{15}+C_{14}C_{25}C_{34}-C_{34}C_{24}C_{15}-C_{13}C_{25}C_{44}-C_{14}C_{23}C_{45}) \\
t &= C_{24}(C_{13}C_{24}C_{35}+C_{23}C_{34}C_{15}+C_{14}C_{25}C_{33}-C_{33}C_{24}C_{15}-C_{13}C_{34}C_{25}-C_{23}C_{14}C_{35})
\end{aligned}$$

**Table S5.** Surface energies ( $\gamma_s$ ) of GaN (n=1,2,3,4,5,6) nanosheets.

| Number of GaN layers (n)            | n=1     | n=2     | n=3     | n=4     | n=5     | n=6     |
|-------------------------------------|---------|---------|---------|---------|---------|---------|
| $\gamma_s(\text{meV}/\text{\AA}^2)$ | -43.274 | -47.153 | -47.341 | -47.344 | -47.344 | -47.345 |

**Table S6.** Formation energy  $E_f$  of Ga-top  $\text{Cs}_2\text{Ba}_2\text{Sr}_3\text{I}_{12}/\text{GaN}$  (n=1,2,3,4,5,6).

| Number of GaN layers (n)      | n=1    | n=2    | n=3    | n=4    | n=5    | n=6    |
|-------------------------------|--------|--------|--------|--------|--------|--------|
| $E_f(\text{eV}/\text{\AA}^2)$ | -0.211 | -0.234 | -0.261 | -0.263 | -0.264 | -0.266 |

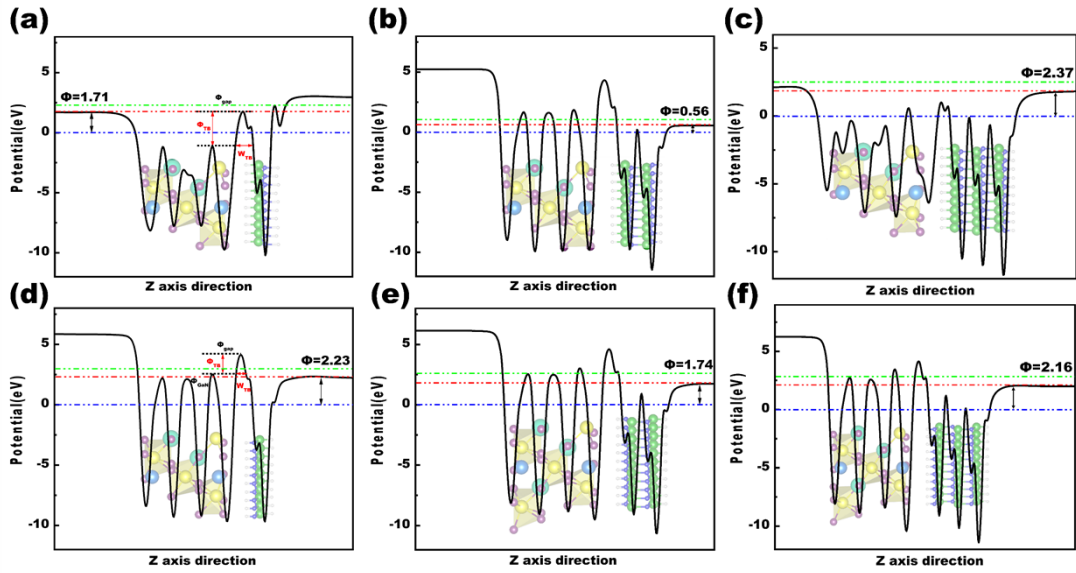

**Fig. S7.** Electrostatic potential distributions of 2D Ba-CsSrI<sub>3</sub>/GaN heterostructures. Electrostatic potentials of (a) Ga-top(n=1), (b) Ga-top(n=2), (c) Ga-top(n=3). Electrostatic potential of (d) N-top(n=1), (e) N-top(n=2), (f) N-top(n=3). Vacuum level, CBM, and Fermi level are indicated by red, blue, and green lines in electrostatic potential distributions, respectively.

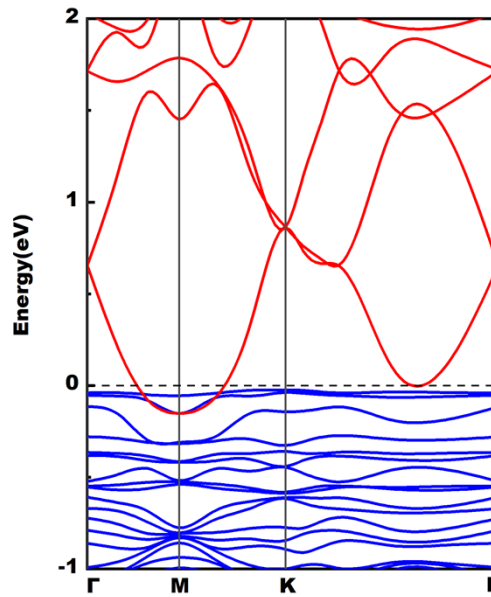

**Fig. S8.** The band structure of the Ba-CsSrI<sub>3</sub>/GaN (n=3) heterojunction with Ga-top configuration.

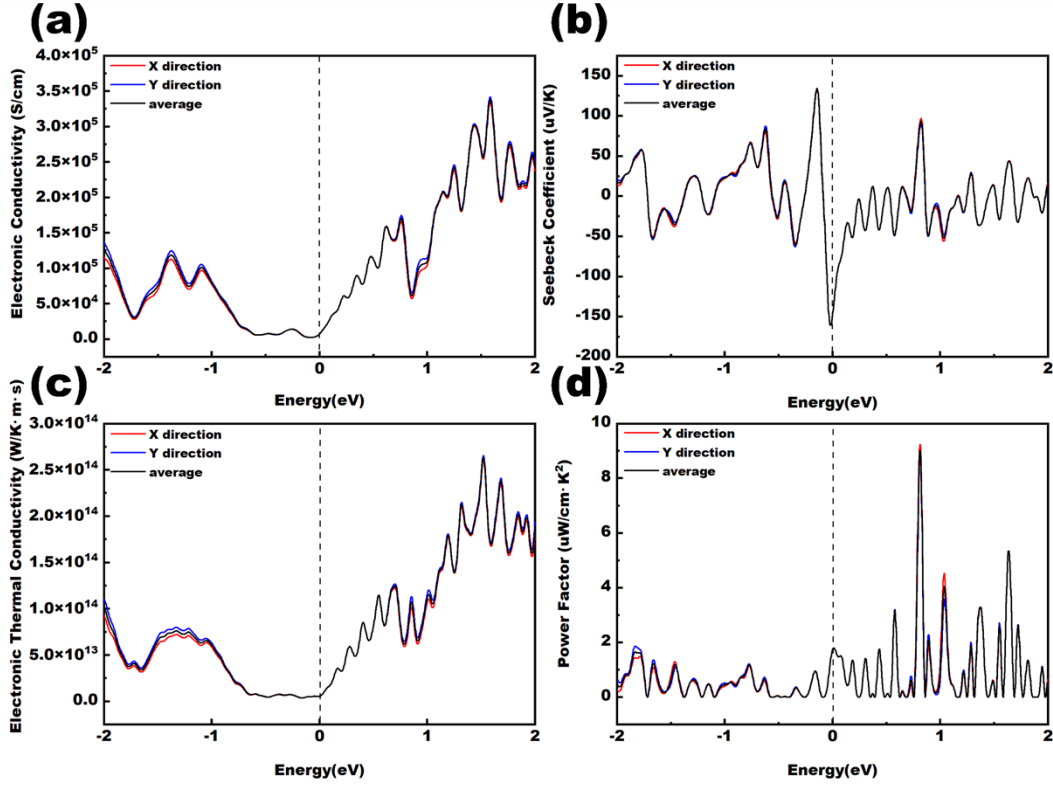

**Fig. S9.** (a) Electronic conductivity (b) Seebeck coefficient (c) electronic thermal conductivity (d) power factor of Ba-CsSrI<sub>3</sub>/GaN (n=3) heterojunction.

The relaxation time  $\tau$  is required to calculate the electrical conductivity. By utilizing the deformation potential (DP) theory, in combined with the effective mass approximation, the  $\tau$  can be calculated as<sup>6</sup>

$$\tau = \frac{um^*}{e} = \frac{2\hbar^3 C}{3k_B T m^* E} \quad (S3)$$

$$C = [\partial^2 E / \partial (\Delta a / a_0)^2] / S_0 \quad (S4)$$

where  $C$  is the elastic constant,  $e$  is the deformation potential energy,  $m^*$  is the effective mass,  $u$  is the mobility of carriers, including electrons and holes,  $\hbar$  is the reduced Planck constant,  $T$  is the temperature,  $E$  is the total energy of the system.  $\Delta a$  is the change of the lattice constant,  $\Delta a / a_0$  is the magnitude of the uniaxial stress, and  $S_0$  is the bottom area of the two-dimensional material.

## REFERENCES

- (1) Xiao, Z.; Meng, W.; Wang, J.; Mitzi, D. B.; Yan, Y. Searching for promising new perovskite-based photovoltaic absorbers: the importance of electronic dimensionality. *Mater. Horiz.* 4 (2017)



206-216.

- (2) Swarnkar, A.; Marshall, A. R.; Sanehira, E. M.; Chernomordik, B. D.; Moore, D. T.; Christians, J. A.; Chakrabarti, T.; Luther, J. M. Quantum dot-induced phase stabilization of  $\alpha$ -CsPbI<sub>3</sub> perovskite for high-efficiency photovoltaics. *Science*. 354 (2016) 92-95.
- (3) Levinshtein, M. E.; Rumyantsev, S. L.; Shur, M.; S. Properties of advanced semiconductor materials: GaN, AlN, InN, BN, SiC, SiGe. John Wiley & Sons: U.K. 2001.
- (4) Abd, E. H.; Ismail, Y.; Deen, M. J. A computational study of nonparabolic conduction band effect on quantum wire transport (eg GaN). *Opt. Quantum Electron.* 45 (2013) 885-899.
- (5) Gao, J.; Liu, Q.; Jiang, C.; Fan, D.; Zhang, M.; Liu, F.; Tang, B. The mechanical stability criterion of 7 large crystal system and its application: taking SiO<sub>2</sub> as an example. *Chin. J. High Press. Phys.* 36 (2022) 051101.
- (6) Bardeen, J.; Shockley, W. J. P. R. Deformation potentials and mobilities in non-polar crystals. *Phys. Rev.* 80 (1950) 72.
